# Supplementary material
Source: Research Square preprint supplement (doi:10.21203/rs.3.rs-9242493/v1)
Supplement: Supplementary file 1 [file a4e31fc2dfb13983ebd412e8.docx]

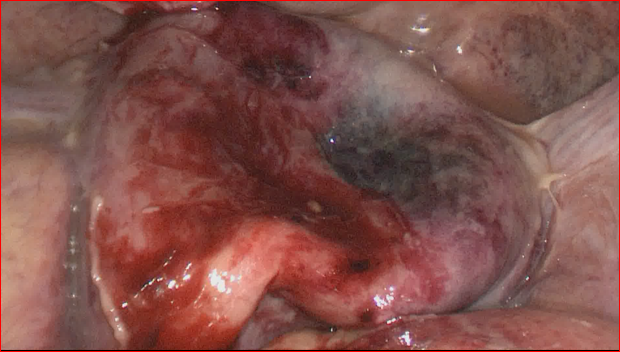

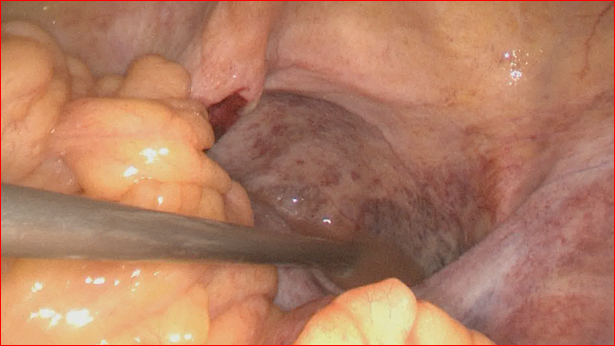


abdominal and pelvic pus

uterus


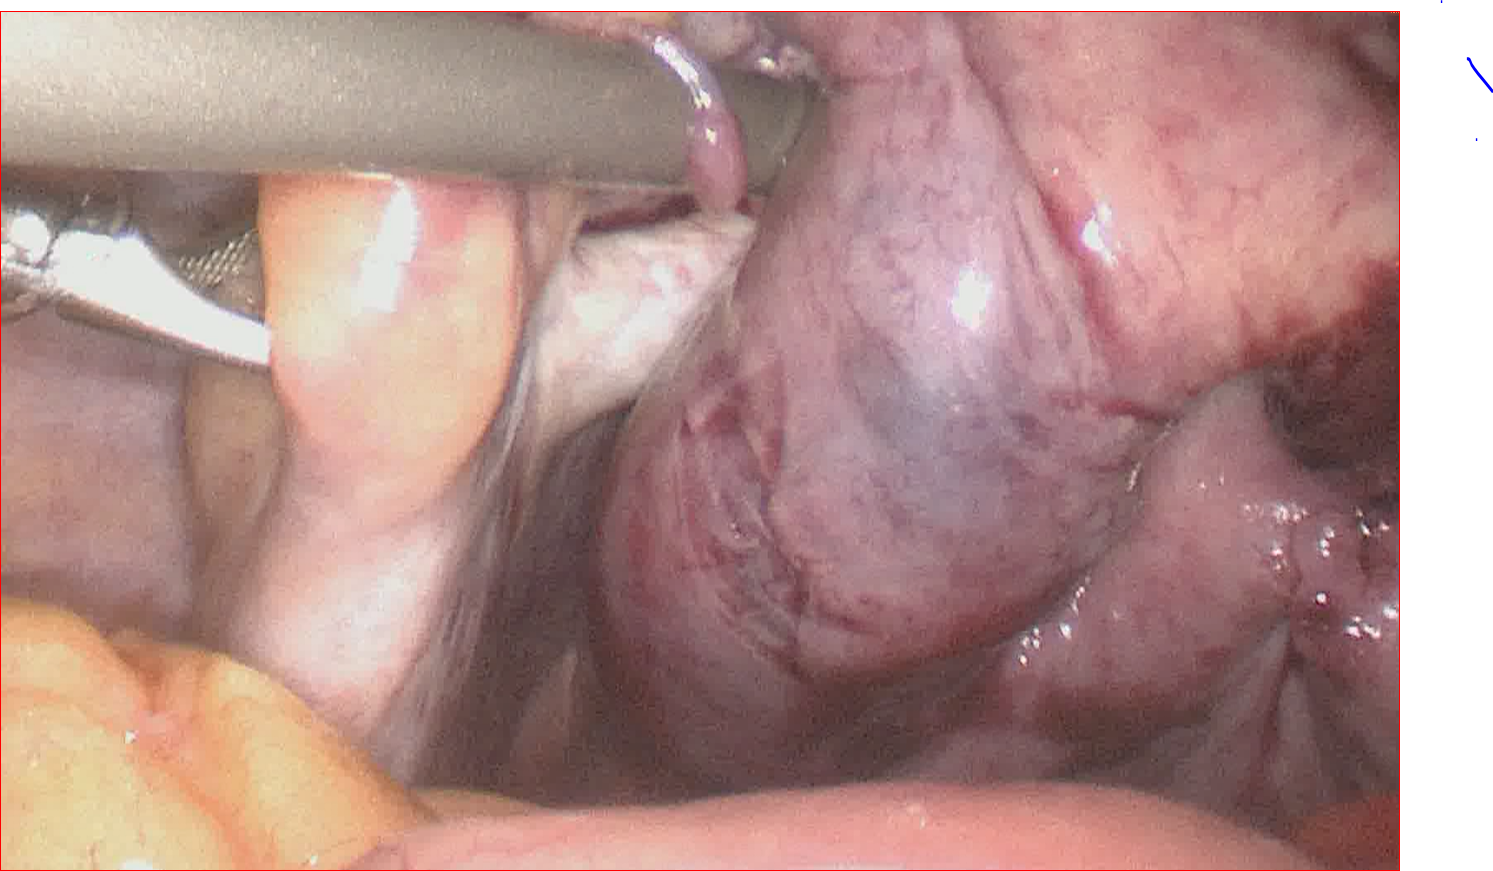


uterus and adnexa


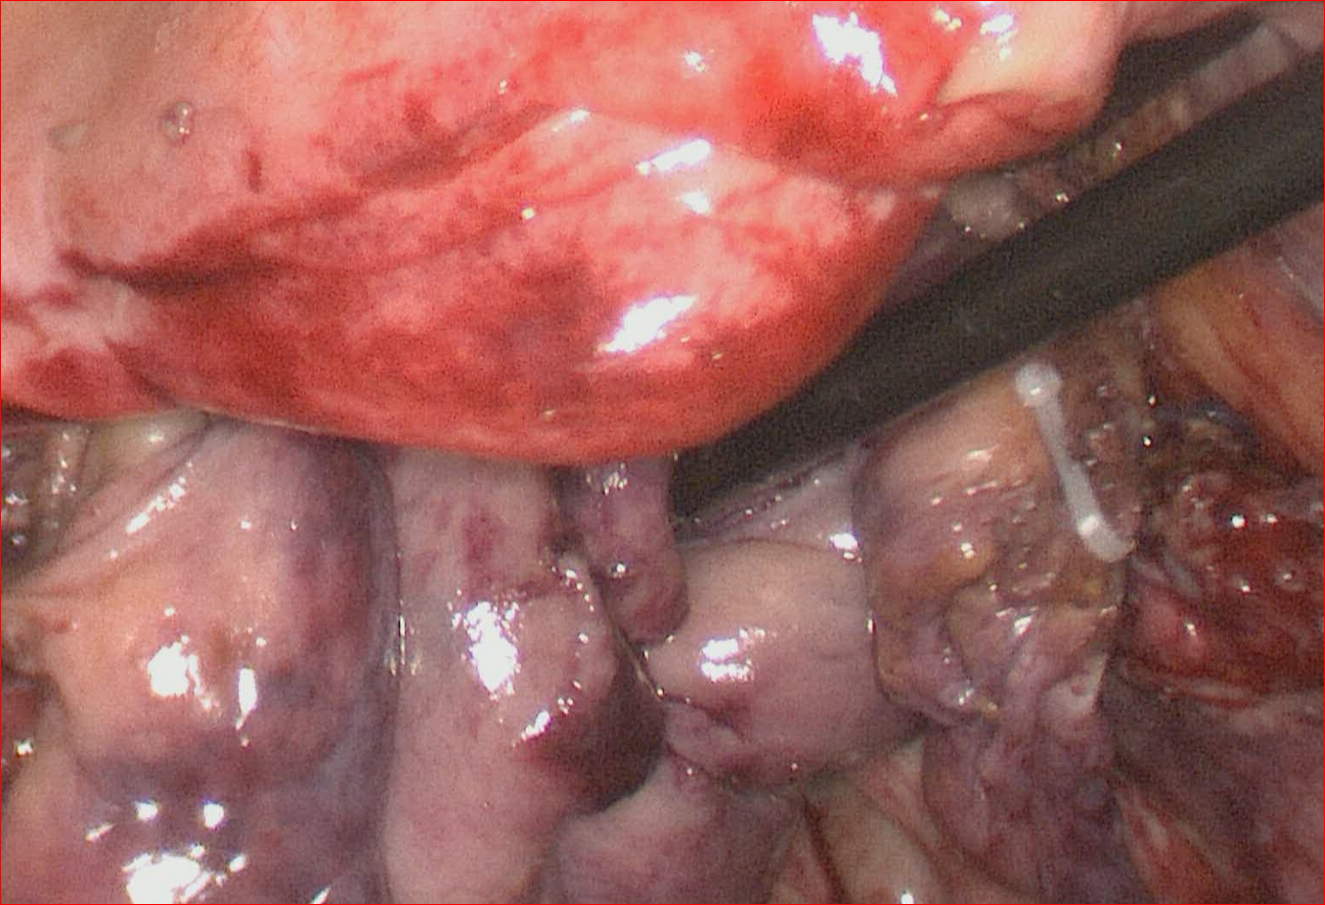


bilateral adnexa following total hysterectomy
